# Supplementary material
Source: ML conference proceedings conference paper supplement (https://proceedings.mlr.press/v216/lee23a.html)
Supplement: Supplementary file 1 [file lee23a-supp.pdf]

---

# Finding Invariant Predictors Efficiently via Causal Structure (Supplementary Material)

---

Kenneth Lee<sup>1</sup>

Md Musfiqur Rahman<sup>1</sup>

Murat Kocaoglu<sup>1</sup>

<sup>1</sup>School of Electrical and Computer Engineering, Purdue University, West Lafayette, Indiana, USA

## A PROOFS OF LEMMAS AND THEOREMS

### A.1 PROOF OF THEOREM 3.2

**Theorem A.1.** *There exists a hedge for  $P(\mathbf{Y}|do(\mathbf{X}), \mathbf{W})$  according to the generalized hedge condition if and only if  $P(\mathbf{Y}|do(\mathbf{X}), \mathbf{W})$  is unidentifiable in  $G$ .*

*Proof.* Let  $\mathbf{Z} \subseteq \mathbf{W}$  be the maximal set such that  $P(Y|do(\mathbf{X}), \mathbf{W}) = P(Y|do(\mathbf{X}, \mathbf{Z}), \mathbf{W} \setminus \mathbf{Z})$ . By Theorem 21 in [4],  $P(\mathbf{Y}|do(\mathbf{X}), \mathbf{W})$  is identifiable in  $G$  if and only if  $P(Y, \mathbf{X} \setminus \mathbf{Z}|do(\mathbf{X}, \mathbf{Z}))$  is identifiable in  $G$ . By Theorem 3.2, there exists a hedge for  $P(Y, \mathbf{W} \setminus \mathbf{Z}|do(\mathbf{X}, \mathbf{Z}))$  if and only if  $p(y, \mathbf{W} \setminus \mathbf{Z}|do(\mathbf{X}, \mathbf{Z}))$  is unidentifiable in  $G$ . Therefore, we can apply the definition of hedge for  $P(Y, \mathbf{W} \setminus \mathbf{Z}|do(\mathbf{X}, \mathbf{Z}))$  to formulate definition 3.1 such that there exists a hedge for  $P(\mathbf{Y}|do(\mathbf{X}), \mathbf{W})$  according to definition 3.1 if and only if  $P(\mathbf{Y}|do(\mathbf{X}), \mathbf{W})$  is unidentifiable in  $G$ .  $\square$

### A.2 PROOF OF LEMMA 3.5

**Lemma A.2.** *Let  $\mathbf{Y} = \{Y\}$ . The output of **Find-MACS-on-set**( $G, \mathbf{Y}$ ) is the MACS of  $Y$ . The MACS of  $Y$  is a  $Y$ -rooted C-tree.*

*Proof.* The line 3 of the Algorithm 2 in Section B.2, first gets an induced subgraph of  $G$  over  $An(Y)$ . That implies every variable in the resulting graph has a directed path to  $Y$  and  $Y$  does not have any child in it. Then, in step 4, it recursively calls on **Find-MACS-on-set** with  $G_{An(Y)}$ . Then, every variable in  $G_{An(Y)}$  must be in  $An(Y)$ . The execution of the algorithm will then move to step 6 to get an induced subgraph of  $G_{An(Y)}$  over  $C(Y)$ .

If there is no bidirected path from any variable to  $Y$ , then the algorithm will return  $Y$ , which is a  $Y$ -rooted C-tree. Suppose otherwise that there is a bidirected path from some variables to  $Y$ , then we have two cases: Case i.) The variables  $\mathbf{M}$  have bidirected paths to  $Y$ , but  $De(\mathbf{M}) \cap An(Y) \setminus \mathbf{M}$  are not in  $C(Y)$  such that  $G_{C(Y)}$  is not a  $Y$ -rooted C-tree. Case ii.) The variables  $\mathbf{M}$  have bidirected paths to  $Y$  and  $De(\mathbf{M}) \cap An(Y) \setminus \mathbf{M}$  are in  $C(Y)$  such that  $G_{C(Y)}$  is a  $Y$ -rooted C-tree. For case i, when the algorithm recursively call on itself at Step 7. Since  $De(\mathbf{M}) \cap An(Y) \setminus \mathbf{M}$  are not in  $C(Y)$ ,  $\mathbf{M} \notin An(Y)$  in  $G_{C(Y)}$ . Then it will return  $Y$  as  $G$ . For case ii, the result trivially follows.  $\square$

### A.3 PROOF OF THEOREM 3.6

**Theorem A.3.** *For some  $W \in Ch(S)$ , if there exists a hedge for  $P(Y|do(W))$ , then for any  $\mathbf{H}, \mathbf{J} \subseteq \mathbf{V}$ , we have  $(Y \not\perp S|\mathbf{J})_{G_{\overline{\mathbf{H}}}}$  or  $P(Y|do(\mathbf{H}), \mathbf{J})$  is unidentifiable in  $G$ .*

*Proof.* Suppose there exists a  $Y$ -rooted C-tree  $F$  in  $G$  such that there exists a hedge for  $P(Y|do(W))$  for some  $W \in Ch(S)$ . We will show that for any  $\mathbf{H}, \mathbf{J} \subseteq \mathbf{V}$ , we have  $(Y \not\perp S|\mathbf{J})_{G_{\overline{\mathbf{H}}}}$  or  $P(Y|do(\mathbf{H}), \mathbf{J})$  is unidentifiable in  $G$

First, suppose  $\mathbf{H}$  does not contain any member in c-forest  $F$ . We will show that there exists an inducing path from  $S$  to  $Y$  such that  $(Y \perp\!\!\!\perp S|\mathbf{J})_{G_{\overline{\mathbf{H}}}}$ . Since every member in  $F \setminus Y$  must have only one child and  $Y$  does not any children in  $G_F$ , every member in  $F$  is in  $An(Y)$ . By definition of hedge,  $W \in F$ . As  $F$  is a C-component by the definition of C-tree and  $W \in Ch(S)$  and  $W \in F$ , for a member  $S_W$  of  $S$  that is  $Pa(W)$ , we can have a path from  $S_W$  to  $Y$  through the directed path from  $W$  to  $Y$  in  $F$  along which every variable on that path is a collider. Therefore, there exists an inducing path from  $S_W$  to  $F$ . By theorem 4.2 in [1],  $S_W$  cannot be d-separated from  $Y$  in  $G$  if and only if there exists an inducing path from  $S_W$  to  $Y$  in  $G$ . Therefore,  $(Y \perp\!\!\!\perp S|\mathbf{J})_{G_{\overline{\mathbf{H}}}}$  for any  $\mathbf{J} \subseteq \mathbf{V}$ . Next, suppose  $\mathbf{H}$  contains some members of  $F$ . By lemma A.17, that  $P(Y|do(\mathbf{H}), \mathbf{J})$  is unidentifiable in  $G$  for any  $\mathbf{J} \subseteq \mathbf{V}$ .  $\square$

#### A.4 PROOF OF THEOREM 3.7

**Theorem A.4.** *If the selection variable  $S$  is a parent of MACS  $T_Y$ , then there is no graph surgery estimator in  $G$ .*

*Proof.* Let  $S$  be a parent of  $T_Y$ , where  $T_Y$  is the MACS of  $Y$  in  $G$ . By Lemma 3.5,  $T_Y$  is a  $Y$ -rooted C-tree. Since  $S \in Pa(T_Y)$ , there exists some members  $W \in Ch(S)$  that are in  $T_Y$  such that there exists a hedge for  $P(Y|do(W))$  by the following construction: let  $F = T_Y$ ,  $F' = \{Y\}$  to be two  $\mathbf{R}$ -rooted C-forest, where  $\mathbf{R} = \{Y\}$ . By Theorem 3.6, the result follows implying that there is no graph surgery estimator in  $G$ .  $\square$

#### A.5 PROOF OF THEOREM 3.8

**Theorem A.5.** *Let  $T_Y$  be the MACS of  $Y$  in  $G$ ,  $\mathcal{H} := \{H : H \in Ch(Y), Pa(T_H) \not\ni S\}$  and  $T_J := \bigcup_{H \in \mathbf{K}} T_H$  for any  $\mathbf{K} \subseteq \mathcal{H}$ , where  $T_H$  is the MACS with respect to the variable  $H$ . Let  $\mathbf{D} = Pa(T_Y \cup T_J)$ . If  $S$  is not a parent of  $T_Y$ , then  $P(Y|do(\mathbf{D}), \mathbf{K}, \mathbf{W})$  is identifiable in  $G$  and  $(Y \perp\!\!\!\perp S|\mathbf{W}, \mathbf{K})_{G_{\overline{\mathbf{D}}}}$  for any  $\mathbf{W} \subseteq (T_Y \cup T_J) \setminus (Y \cup \mathbf{K})$ .*

*Proof.* Let  $T_Y$  be the MACS of  $Y$  in  $G$ . Let  $\mathcal{H} := \{H : H \in Ch(Y), Pa(T_H) \not\ni S\}$ ,  $T_J := \bigcup_{H \in \mathbf{K}} T_H$  for some  $\mathbf{K} \subseteq \mathcal{H}$ . Let  $\mathbf{D} = Pa(T_Y \cup T_J)$ . Recall that by the conditions of the theorem,  $S$  is not a parent of  $T_Y$ .

Consider any  $\mathbf{W} \subseteq (T_Y \cup T_J) \setminus (Y \cup \mathbf{K})$ . We first prove the following claim.

**Claim:**  $P(Y|do(\mathbf{D}), \mathbf{K}, \mathbf{W}) \neq P(Y|do(\mathbf{D}), \mathbf{Z}), (\mathbf{K} \cup \mathbf{W}) \setminus \mathbf{Z}$  for any  $\mathbf{Z} \subset \mathbf{K} \cup \mathbf{W}, \mathbf{Z} \neq \emptyset$ .

*Proof.* For the sake of contradiction, suppose there exists a non-empty subset  $\mathbf{Z}$  where the equality holds. Under the extended faithfulness assumption, this would only be true if do-calculus Rule 2 is applicable through the following graphical condition:

$$(Y \perp\!\!\!\perp \mathbf{Z}|\mathbf{K} \cup \mathbf{W} \setminus \mathbf{Z})_{G_{\overline{\mathbf{Z}, \mathbf{D}}}} \quad (1)$$

Now observe that any node  $U$  in  $T_Y \cup T_J$  must belong to a  $T_H$  for some  $H \in \mathbf{K}$  or  $T_Y$ . By definition of  $T_H$  (or  $T_Y$ ), there must be a bidirected path from  $U$  to  $H$  (or  $Y$ ) that only goes through nodes in  $T_H$  (or  $T_Y$ ). By definition of  $T_H$  (or  $T_Y$ ), any node along this bidirected path must be an ancestor of  $H$  (or  $Y$ ). Therefore, there is a d-connecting path from  $U$  to  $H$  (or  $Y$ ) that starts with an arrow into  $U$ . Note that further conditioning cannot break this path since the path only consists of colliders. Finally, for the case where  $U$  belongs to a  $T_H$ , as the conditioning set contains  $H$ , we can concatenate this path with the edge  $Y \rightarrow H$  to obtain a d-connecting path to  $Y$ , since  $H$  is a collider along this concatenated path. This contradicts with the d-separation statement above.  $\square$

For the sake of contradiction, suppose for some  $\mathbf{W} \subseteq (T_Y \cup T_J) \setminus (Y \cup \mathbf{K})$ , either  $P(Y|do(\mathbf{D}), \mathbf{K}, \mathbf{W})$  is unidentifiable in  $G$  or  $(Y \perp\!\!\!\perp S|\mathbf{W}, \mathbf{K})_{G_{\overline{\mathbf{D}}}}$ .

**Suppose  $P(Y|do(\mathbf{D}), \mathbf{K}, \mathbf{W})$  is unidentifiable in  $G$ .**

By Theorem 3.2, there must exist a hedge for  $P(Y|do(\mathbf{D}), \mathbf{K}, \mathbf{W})$ . The claim above implies that the maximal set  $\mathbf{Z}$  such that  $P(Y|do(\mathbf{D}), \mathbf{K}, \mathbf{W}) = P(Y|do(\mathbf{D}), \mathbf{Z}), \mathbf{K} \cup \mathbf{W} \setminus \mathbf{Z}$  is an empty set by rule 2 of do-calculus.

Since  $\mathbf{Z} = \emptyset$ , by Definition 3.1, there exists a hedge for  $P(Y|do(\mathbf{D}), \mathbf{K}, \mathbf{W})$  only if there exists two  $\mathbf{R}$ -rooted C-forests  $F, F'$  such that  $F \cap \mathbf{D} \neq \emptyset$  and  $F' \cap \mathbf{D} = \emptyset$  for some  $\mathbf{R} \subset An(Y \cup \mathbf{K} \cup \mathbf{W})_{G_{\overline{\mathbf{D}}}}$ . Consider any such  $\mathbf{R}, F, F'$ . Since  $F' \cap \mathbf{D} = \emptyset$  and  $F'$  is a  $\mathbf{R}$ -rooted C-forest, it must be the case that  $\mathbf{D} \cap \mathbf{R} = \emptyset$ . Since  $\mathbf{D} \cap \mathbf{R} = \emptyset$  and intervening on  $\mathbf{D}$  removes the incoming edges of  $\mathbf{D}$ , any member of  $An(Y \cup \mathbf{K} \cup \mathbf{W})$  will be in  $T_Y \cup T_J$  such that  $\mathbf{R} \subseteq T_Y \cup T_J$ . But this is a contradiction due to the following:

Suppose  $\mathbf{R} \subseteq T_Y \cup T_J$ . Since  $\mathbf{D} \cap \mathbf{R} = \emptyset$  and  $F \cap \mathbf{D} \neq \emptyset$ , that implies some members of  $\mathbf{D}$  must have a directed path to some members in  $\mathbf{R}$ . If that is the case, then that member of  $\mathbf{D}$  must also be in  $T_Y \cup T_H$ , where  $T_Y$  is a  $Y$ -rooted C-tree and  $T_H$  is a  $H$ -rooted C-tree for some  $H \in Ch(Y)$ , which is also in  $T_J$ . But this is a contradiction as any member of  $\mathbf{D}$  cannot be in  $T_Y \cup T_J$  by the definition of  $\mathbf{D}$ . Thus,  $\mathbf{R} \not\subseteq (T_Y \cup T_J)$ .

Therefore, there is no hedge for  $P(Y|do(\mathbf{D}), \mathbf{K}, \mathbf{W})$ . By Theorem 3.2,  $P(Y|do(\mathbf{D}), \mathbf{K}, \mathbf{W})$  is identifiable in  $G$ .

**Suppose**  $(Y \perp\!\!\!\perp S|\mathbf{W}, \mathbf{K})_{G_{\overline{\mathbf{D}}}}$ .

Next, we will show  $(Y \perp\!\!\!\perp S|\mathbf{W}, \mathbf{K})_{G_{\overline{\mathbf{D}}}}$  for any  $\mathbf{W} \subseteq (T_Y \cup T_J) \setminus (Y \cup \mathbf{K})$ . Given that  $S$  is not a parent of  $T_Y$ , we will consider two cases separately: *i.)*  $S \in An(Y)$ ; *ii.)*  $S \notin An(Y)$

$S \in An(Y)$ : Suppose there exists a d-connecting path from  $S$  to  $Y$  by conditioning on  $\mathbf{W} \cup \mathbf{K}$  and intervening on  $\mathbf{D}$  for some  $\overline{\mathbf{W}} \subseteq (T_Y \cup T_J) \setminus (Y \cup \mathbf{K})$ . First, there is no directed path from  $S$  to  $Y$  in  $G_{\overline{\mathbf{D}}}$  since  $S$  is not a parent of  $T_Y$  by the conditions of the theorem and we intervene on  $\mathbf{D}$ , which is a superset of  $Pa(T_Y)$  and  $Y \in T_Y$ . For some  $\mathbf{W} \subseteq (T_Y \cup T_J) \setminus (Y \cup \mathbf{K})$ , conditioning on  $\mathbf{W}$  must have opened paths with colliders that are in  $An(\mathbf{W})$ . However, since any member of  $\mathbf{W}$  is in  $T_Y \cup T_J$  and any incoming edges of  $Pa(T_Y \cup T_J)$  are removed in  $G_{\overline{\mathbf{D}}}$  and  $S$  is not a parent of any member of  $T_J$  by definition of  $T_J$ , there cannot be a d-connecting path from  $S$  to  $Y$  in  $G_{\overline{\mathbf{D}}}$ . Therefore, a contradiction. We have  $(Y \perp\!\!\!\perp S|\mathbf{W}, \mathbf{K})_{G_{\overline{\mathbf{D}}}}$  for any  $\mathbf{W} \subseteq (T_Y \cup T_J) \setminus (Y \cup \mathbf{K})$  when  $S \in An(Y)$ .

$S \notin An(Y)$ : we will show *i.)* there is no d-connecting path from  $S$  to  $Y$  ends with a member of  $Ch(Y)$  and *ii.)* there is no d-connecting path from  $S$  to  $Y$  ends with a bidirected neighbor of  $Y$ .

**Show that there is no d-connecting path from  $S$  to  $Y$  that ends with a member of  $Ch(Y)$ .** Any child of  $Y$  where parents of its MACS do not contain  $S$  will be in  $T_J = \bigcup_{H \in \mathbf{K}} T_H$  for some  $\mathbf{K} \subseteq \mathcal{H}$  and we intervene on  $Pa(T_Y \cup T_J)$  so that there is no path from  $S$  to any such child of  $Y$ . Suppose the d-connecting path from  $S$  to  $Y$  ends with some other members of  $Ch(Y)$ . However, for any such path, we must have conditioned on the descendants of those children of  $Y$  to open the path from  $S$  to  $Y$  through some descendants of  $Y$ , but any child of  $Y$  that is in  $\mathbf{K}$ , its parents are also intervened such that any path from  $S$  to  $Y$  through those children are blocked. For any other children that are not in  $\mathbf{K}$  either form a collider or their descendants form a collider to block any other active paths from  $S$  to  $Y$ . Therefore, there is no d-connecting path from  $S$  to  $Y$  that ends with a member of  $Ch(Y)$ .

**Show that there is no d-connecting path from  $S$  to  $Y$  ends with a bidirected neighbor of  $Y$ .** Suppose further that bidirected neighbor of  $Y$  is a child of  $Y$ . From above, we have proved there is no d-connecting path from  $S$  to  $Y$  ends with a member of  $Ch(Y)$ . Suppose that bidirected neighbor of  $Y$  is not a child of  $Y$  and there exists some d-connecting paths from  $S$  to  $Y$  that ends with those bidirected neighbor of  $Y$ , for the case where there is no any descendant of those bidirected neighbors of  $Y$  is in  $\mathbf{W}$ , any path from  $S$  to  $Y$  along that bidirected neighbor of  $Y$  is blocked as there exists a collider along any such path and that bidirected neighbor is not in  $T_J$ . Therefore, there is no d-connecting path from  $S$  to  $Y$ . For the case where there exists some descendants of those bidirected neighbors  $\mathbf{X}$  of  $Y$  is in  $\mathbf{W}$ , but any parent of those descendants must be in  $\mathbf{D}$  such that all the incoming edges of any such parent are removed so that any d-connecting path from  $S$  to any of those parents will be blocked. Any d-connecting path from  $S$  to the members along the upstream path of those parents to  $\mathbf{X}$  will be blocked by a collider along the path by concatenating the path  $Y \rightarrow X$  or  $M \rightarrow L$  for some descendants  $M, L$  of  $\mathbf{X}$ , where  $M \neq L$ .

Therefore, we have  $(Y \perp\!\!\!\perp S|\mathbf{W}, \mathbf{K})_{G_{\overline{\mathbf{D}}}}$ . □

## A.6 PROOF OF THEOREM 3.10

**Theorem A.6.** Let  $T_Y$  be the MACS of  $Y$  in  $G$ ,  $T_H$  be the MACS of a child  $H$  of  $Y$  in  $G$ . Define  $T_C := \bigcup_{H \in Ch(Y)} T_H$ ,  $\mathcal{Z} := \{Z : Z \in (C(Y) \cap Nbr(Y)) \setminus (T_Y \cup T_C) \text{ s.t. } Pa(T_{Y \cup Z}) \not\cong S\}$  and  $T_B := \bigcup_{Z \in \mathbf{M}} T_{Y \cup Z}$  for any  $\mathbf{M} \subseteq \mathcal{Z}$  where  $T_{Y \cup Z}$  is the MACS for the set  $(Y \cup Z)$ . Let  $\mathbf{D} = Pa(T_B)$ . If  $S$  is not a parent of  $T_Y$ , then  $P(Y|do(\mathbf{D}), \mathbf{M}, \mathbf{W})$  is identifiable in  $G$  and  $(Y \perp\!\!\!\perp S|\mathbf{W}, \mathbf{M})_{G_{\overline{\mathbf{D}}}}$  for any  $\mathbf{W} \subseteq (T_B) \setminus (Y \cup \mathbf{M})$ .

*Proof.* Let  $T_Y$  be the MACS of  $Y$  in  $G$ ,  $T_H$  be the MACS of a child  $H$  of  $Y$  in  $G$ . Define  $T_C := \bigcup_{H \in Ch(Y)} T_H$ . Let  $\mathcal{Z} := \{Z : Z \in (C(Y) \cap Nbr(Y)) \setminus (T_Y \cup T_C) \text{ s.t. } Pa(T_{Y \cup Z}) \not\cong S\}$ ,  $T_B := \bigcup_{Z \in \mathbf{M}} T_Z$  for some  $\mathbf{M} \subseteq \mathcal{Z}$ . Let  $\mathbf{D} = Pa(T_B)$ . Recall that by the conditions of the theorem,  $S$  is not a parent of  $T_Y$ .

Consider any  $\mathbf{W} \subseteq (T_B) \setminus (Y \cup \mathbf{M})$ . We first prove the following claim.

**Claim:**  $P(Y|do(\mathbf{D}), \mathbf{M}, \mathbf{W}) \neq P(Y|do(\mathbf{D}), \mathbf{Q}), (\mathbf{M} \cup \mathbf{W}) \setminus \mathbf{Q}$  for any  $\mathbf{Q} \subset \mathbf{M} \cup \mathbf{W}, \mathbf{Q} \neq \emptyset$ .

*Proof.* For the sake of contradiction, suppose there exists a non-empty subset  $\mathbf{Q}$  where the equality holds. Under the extended faithfulness assumption, this would only be true if do-calculus Rule 2 is applicable through the following graphical condition:

$$(Y \perp\!\!\!\perp \mathbf{Q} \mid \mathbf{M} \cup \mathbf{W} \setminus \mathbf{Q})_{G_{\mathbf{Q}, \bar{\mathbf{D}}}} \quad (2)$$

Now observe that any node  $U$  in  $T_B$  must belong to a  $T_{Y \cup Z}$  for some  $Z \in \mathbf{M}$ . By definition of  $T_{Y \cup Z}$ , there must be a bidirected path from  $U$  to  $Z$  and  $Y$  that only goes through nodes in  $T_{Y \cup Z}$ . By definition of  $T_{Y \cup Z}$ , any node along this bidirected path must be an ancestor of  $Z$  or  $Y$ . Therefore, there is a d-connecting path from  $U$  to  $Z$  or  $Y$  that starts with an arrow into  $U$ . Note that further conditioning cannot break this path since the path only consists of colliders. Finally, for the case where there is a d-connecting path from  $U$  to  $Z$ , as the conditioning set contains  $Z$ , we can concatenate this path with the edge  $Y \leftrightarrow Z$  to obtain a d-connecting path to  $Y$ , since  $Z$  is a collider along this concatenated path. This contradicts with the d-separation statement above.  $\square$

For the sake of contradiction, suppose for some  $\mathbf{W} \subseteq (T_B) \setminus (Y \cup \mathbf{M})$ , either  $P(Y \mid do(\mathbf{D}), \mathbf{M}, \mathbf{W})$  is unidentifiable in  $G$  or  $(Y \not\perp\!\!\!\perp S \mid \mathbf{W}, \mathbf{M})_{G_{\bar{\mathbf{D}}}}$ .

**Suppose  $P(Y \mid do(\mathbf{D}), \mathbf{M}, \mathbf{W})$  is unidentifiable in  $G$ .**

By Theorem 3.2, there must exist a hedge for  $P(Y \mid do(\mathbf{D}), \mathbf{M}, \mathbf{W})$ . The claim above implies that the maximal set  $\mathbf{Q}$  such that  $P(Y \mid do(\mathbf{D}), \mathbf{M}, \mathbf{W}) = P(Y \mid do(\mathbf{D}), \mathbf{M} \cup \mathbf{W} \setminus \mathbf{Q})$  is an empty set by rule 2 of do-calculus.

Since  $\mathbf{Q} = \emptyset$ , by Definition 3.1, there exists a hedge for  $P(Y \mid do(\mathbf{D}), \mathbf{M}, \mathbf{W})$  only if there exists two  $\mathbf{R}$ -rooted C-forests  $F, F'$  such that  $F \cap \mathbf{D} \neq \emptyset$  and  $F' \cap \mathbf{D} = \emptyset$  for some  $\mathbf{R} \subset An(Y \cup \mathbf{M} \cup \mathbf{W})_{G_{\bar{\mathbf{D}}}}$ . Consider any such  $\mathbf{R}, F, F'$ . Since  $F' \cap \mathbf{D} = \emptyset$  and  $F'$  is a  $\mathbf{R}$ -rooted C-forest, it must be the case that  $\mathbf{D} \cap \mathbf{R} = \emptyset$ . Since  $\mathbf{D} \cap \mathbf{R} = \emptyset$  and intervening on  $\mathbf{D}$  removes the incoming edges of  $\mathbf{D}$ , any member of  $An(Y \cup \mathbf{M} \cup \mathbf{W})$  will be in  $T_B$  such that  $\mathbf{R} \subseteq T_B$ . But this is a contradiction due to the following:

Suppose  $\mathbf{R} \subseteq T_B$ . Since  $\mathbf{D} \cap \mathbf{R} = \emptyset$  and  $F \cap \mathbf{D} \neq \emptyset$ , that implies some members of  $\mathbf{D}$  must have a directed path to some members in  $\mathbf{R}$ . If that is the case, then some members of  $\mathbf{D}$  must also be in  $T_{Y \cup Z}$ , which is also in  $T_B$ . But this is a contradiction as any member of  $\mathbf{D}$  cannot be in  $T_B$  by the definition of  $\mathbf{D}$ . Thus,  $\mathbf{R} \not\subseteq T_B$ .

Therefore, there is no hedge for  $P(Y \mid do(\mathbf{D}), \mathbf{M}, \mathbf{W})$ . By Theorem 3.2,  $P(Y \mid do(\mathbf{D}), \mathbf{M}, \mathbf{W})$  is identifiable in  $G$ .

**Suppose  $(Y \not\perp\!\!\!\perp S \mid \mathbf{W}, \mathbf{M})_{G_{\bar{\mathbf{D}}}}$ .**

Next, we will show  $(Y \perp\!\!\!\perp S \mid \mathbf{W}, \mathbf{M})_{G_{\bar{\mathbf{D}}}}$  for any  $\mathbf{W} \subseteq (T_B) \setminus (Y \cup \mathbf{M})$ . Given that  $S$  is not a parent of  $T_Y$ , we will consider two cases separately: *i.*)  $S \in An(Y)$ ; *ii.*)  $S \notin An(Y)$

$S \in An(Y)$ : Suppose there exists a d-connecting path from  $S$  to  $Y$  by conditioning on  $\mathbf{W} \cup \mathbf{M}$  and intervening on  $\mathbf{D}$  for some  $\bar{\mathbf{W}} \subseteq T_B \setminus (Y \cup \mathbf{M})$ . First, there is no directed path from  $S$  to  $Y$  in  $G_{\bar{\mathbf{D}}}$  since  $S$  is not a parent of  $T_Y$  by the conditions of the theorem and we intervene on  $\mathbf{D}$ , which is a superset of  $Pa(T_Y)$  and  $Y \in T_Y$  since  $T_Y \subset T_B$ . For some  $\mathbf{W} \subseteq T_B \setminus (Y \cup \mathbf{M})$ , conditioning on  $\mathbf{W}$  must have opened paths with colliders that are in  $An(\mathbf{W})$ . However, since any member of  $\mathbf{W}$  is in  $T_B$  and any incoming edges of  $Pa(T_B)$  are removed in  $G_{\bar{\mathbf{D}}}$  and  $S$  is not a parent of any member of  $T_{Y \cup Z}$  by definition of  $T_B$ , there cannot be a d-connecting path from  $S$  to  $Y$  in  $G_{\bar{\mathbf{D}}}$ . Therefore, a contradiction. We have  $(Y \perp\!\!\!\perp S \mid \mathbf{W}, \mathbf{M})_{G_{\bar{\mathbf{D}}}}$  for any  $\mathbf{W} \subseteq T_B \setminus (Y \cup \mathbf{M})$  when  $S \in An(Y)$ .

$S \notin An(Y)$ : we will show *i.*) there is no d-connecting path from  $S$  to  $Y$  ends with a member of  $Ch(Y)$  and *ii.*) there is no  $\bar{d}$ -connecting path from  $S$  to  $Y$  ends with a bidirected neighbor of  $Y$ .

**Show that there is no d-connecting path from  $S$  to  $Y$  that ends with a member of  $Ch(Y)$ .** For the case where there is no descendant of any children of  $Y$  are in  $\mathbf{W}$ . Since  $\mathbf{W}$  does not contain any child of  $Y$ , any d-connecting path from  $S$  to any child  $J$  of  $Y$ , we can concatenate this path with the edge  $Y \rightarrow J$  to obtain a blocked path to  $Y$  as  $J$  is a collider along this concatenated path. Suppose there exists some descendants of some children of  $Y$  that are in  $\mathbf{W}$ . Note that for any member in  $\mathbf{W}$ , its parents are in  $\mathbf{D}$  such that all incoming edges of those parents are removed and there cannot be a d-connecting path from  $S$  to  $Y$  by concatenating the path  $Y \rightarrow J$  for any child  $J$  of  $Y$  as any  $J$  is not in  $\mathbf{W}$  nor such path can be opened by conditioning on  $\mathbf{W}$ .

**Show that there is no d-connecting path from  $S$  to  $Y$  ends with a bidirected neighbor of  $Y$ .** Suppose further that bidirected neighbor of  $Y$  is a child of  $Y$ . From above, we have proved there is no d-connecting path from  $S$  to  $Y$  ends with a member of  $Ch(Y)$ . Any bidirected neighbor of  $Y$  where it is not a child of  $Y$  and the parents of its MACS do not contain  $S$  will be in  $T_B = \bigcup_{Z \in \mathbf{M}} T_{Y \cup Z}$  for some  $\mathbf{M} \subseteq \mathcal{Z}$  and we intervene on  $Pa(T_B)$  so that there is no path from  $S$  to any such bidirected

neighbor of  $Y$ . Suppose the d-connecting path from  $S$  to  $Y$  ends with some other members of bidirected neighbors that is not child of  $Y$ . Since those bidirected neighbors  $\mathbf{A}$  are not in  $\mathbf{W}$ , there exists some descendants of  $\mathbf{A}$  are in  $\mathbf{W}$ . However, for any such descendant, its parent must be in  $\mathbf{D}$  such that all the incoming edges of that parent are removed. That implies any such path is blocked. Since no member of  $\mathbf{A}$  are in  $\mathbf{W}$ , any d-connecting path will be blocked by concatenating  $Y \rightarrow A$  and having a collider  $A \in \mathbf{A}$  along that concatenated path. Thus, there is no d-connecting path from  $S$  to  $Y$  ends with a bidirected neighbor of  $Y$ .

Therefore, we have  $(Y \perp\!\!\!\perp S | \mathbf{W}, \mathbf{M})_{G_{\overline{\mathbf{D}}}}$ . □

## A.7 PROOF OF THEOREM 3.11

We will first prove the following lemma.

**Lemma A.7.** *If  $S \notin An(Y)$  and **ID4IP** (Algorithm 3) returns **FAIL**, then there is no parent of  $Y$  in  $G$ .*

*Proof.* For the sake of contradiction, assume there exists some parents of  $Y$  in  $G$ . Given as the conditions of the lemma, we know that  $S \notin An(Y)$  and **ID4IP** returns **FAIL**. Since  $S \notin An(Y)$ , **ID4IP** will only return **FAIL** at line 13 since line 6 requires that  $S \in An(Y)$ .  $P(Y|do(Pa(T_Y)), T_Y \setminus Y)$  will be a graph surgery estimator by Corollary 3.9. This is a contradiction because **ID4IP** returns **FAIL** at line 13 due to  $P_{set} = \emptyset$ . Therefore, if  $S \notin An(Y)$  and **ID4IP** returns **FAIL**, there is no parent of  $Y$  in  $G$ . □

**Theorem A.8.** *If there exists a graph surgery estimator, **ID4IP** outputs a graph surgery estimator.*

**Claim:** Given  $S \in An(Y)$ , if there exists a graph surgery estimator, **ID4IP** (Algorithm 3) outputs a graph surgery estimator.

We will first prove the above claim

*Proof.* As given by the condition,  $S \in An(Y)$  and there exists a graph surgery estimator. By Theorem 3.7,  $S \notin Pa(T_Y)$ , where  $T_Y$  is the MACS of  $Y$ .  $S$  has no incoming edges by problem set up so  $S$  cannot be in  $T_Y$ . Also, since there is a directed path from  $S$  to  $Y$  and  $S$  is not a parent of  $T_Y$ ,  $S \in An(M)$  for some  $M \in Pa(T_Y)$ . By Corollary 3.9, **ID4IP** will output a graph surgery estimator at line 7 of the algorithm. □

Next, we will prove the theorem.

*Proof.* With the claim above, we only need to consider the case where  $S \notin An(Y)$ . Suppose  $S \notin An(Y)$ . Note that since  $S \notin An(Y)$ , this **FAIL** is returned by line 13 of the algorithm.

We will prove it by using contraposition. Suppose **ID4IP** returns **FAIL**, for the sake of contradiction, suppose also there exists a graph surgery estimator  $P(Y|do(\mathbf{Q}), \mathbf{W})$  for some  $\mathbf{Q} \subseteq \mathbf{V}$  and some  $\mathbf{W} \subseteq \mathbf{V} \setminus \mathbf{Q}$ .

We will consider the following cases where *i.)  $\mathbf{Q} = \emptyset, \mathbf{W} \neq \emptyset$ ; ii.)  $\mathbf{Q} \neq \emptyset, \mathbf{W} = \emptyset$ ; iii.)  $\mathbf{Q} \neq \emptyset, \mathbf{W} \neq \emptyset$*

*i.)  $\mathbf{Q} = \emptyset, \mathbf{W} \neq \emptyset$ .* Given  $\mathbf{Q} = \emptyset, \mathbf{W} \neq \emptyset$ , it must be the case that there exists some  $W \in \mathbf{W}$  that has a d-connecting path to  $Y$ . By Lemma A.7,  $Y$  has no parents in  $G$ . It implies that any such path must end at a child of  $Y$  or a bidirected neighbor of  $Y$ . If such path ends at a child of  $Y$ , for any such child  $K$  of  $Y$ , there exists an inducing path from  $S$  to  $K$  since  $S \in Pa(T_K)$  and  $T_K$  is a  $K$ -rooted C-tree. It implies that there exists no subset in  $\mathbf{V}$  such that  $Y$  and  $S$  can be d-separated by Theorem 4.2 in [1]. Since  $\mathbf{Q} = \emptyset$ , we have  $(Y \not\perp\!\!\!\perp S | \mathbf{W})_G$ , which is a contradiction. Similarly, if such path ends at a bidirected neighbor of  $Y$  that is not a child of  $Y$ , for any such bidirected neighbor  $Z$  of  $Y$ ,  $S \in Pa(T_{Y \cup Z})$ , which implies  $(Y \not\perp\!\!\!\perp S | \mathbf{W})_G$ . It is because **ID4IP** returns **FAIL** implies that  $S$  is a parent of the MACS of  $\{Y, Z\}$  for any bidirected neighbor  $Z$  of  $Y$  that is not a child of  $Y$ . Observe that any node  $U$  in  $T_{Y \cup Z}$  for any  $Z$ ,  $U$  has a bidirected path to  $Z$ . By the definition of  $T_{Y \cup Z}$ , any node along this bidirected path must be an ancestor of  $Z$ . Therefore, there is a d-connecting path from  $U$  to  $Z$  that starts with an arrow into  $U$ . Note that further conditioning cannot break this path since the path only consists of colliders. As  $\mathbf{W} \neq \emptyset$ , if  $Z$  is not in  $\mathbf{W}$ , then any such member will be d-separated from  $Y$  by concatenating any d-connecting path from  $U$  to  $Z$  with  $Y \leftrightarrow Z$  such that  $P(Y|\mathbf{W}) = P(Y)$ . If  $Z$  is in  $\mathbf{W}$ , then  $(Y \not\perp\!\!\!\perp S | \mathbf{W})_G$ . Therefore, we have reached a contradiction for the case when  $\mathbf{Q} = \emptyset, \mathbf{W} \neq \emptyset$ .

ii.)  $\mathbf{Q} \neq \emptyset, \mathbf{W} = \emptyset$ . By Lemma A.7, there is no parent of  $Y$  in  $G$ . Any member of  $\mathbf{Q}$  must be non-ancestors of  $Y$ . Then, either  $Y$  has a directed path to some  $Q \in \mathbf{Q}$  or there is no directed path to any  $Q \in \mathbf{Q}$  such that  $(Y \perp\!\!\!\perp \mathbf{Q})_{G_{\overline{\mathbf{Q}}}}$ . By rule 3 of do-calculus, that implies  $P(Y|do(\mathbf{Q})) = P(Y)$ , which is a contradiction.

iii.)  $\mathbf{Q} \neq \emptyset, \mathbf{W} \neq \emptyset$ . We consider the case where  $P(Y|do(\mathbf{Q}), \mathbf{W}) \neq P(Y|\mathbf{W})$  and  $P(Y|do(\mathbf{Q}), \mathbf{W}) \neq P(Y|do(\mathbf{Q}))$  as we have reached contradiction for those cases. Since there is no parent of  $Y$  in  $G$  by Lemma A.7, both  $\mathbf{Q}$  and  $\mathbf{W}$  must be non-ancestors of  $Y$ . Also, since **ID4IP** returns **FAIL**, there is no children  $H$  of  $Y$  where  $S \notin Pa(T_H)$  and there is also no bidirected neighbor  $Z$  of  $Y$  such that  $S \notin Pa(T_{Y \cup Z})$ .

If  $S$  is not connected with  $Y$  and **ID4IP** return **FAIL**, then there will be no children or bidirected neighbors of  $Y$ . It is because  $S$  is disconnected with  $Y$  implies  $S \notin Pa(T_H)$  and  $S \notin Pa(T_{Y \cup Z})$  for any child and bidirected neighbor of  $Y$ . To see this, suppose there exist some children of  $Y$  and bidirected neighbor of  $Y$  in  $G$ , **ID4IP** will not return **FAIL** as any of those children and bidirected neighbors will be in either  $T_H$  or  $T_{Y \cup Z}$  for some children of  $Y$ ,  $H$  and bidirected neighbors  $Z$  of  $Y$ . We can have predictors return at line 8 and 10 of Algorithm 3. Thus, it is a contradiction. Since there are no children of  $Y$  and bidirected neighbors of  $Y$  and no parents of  $Y$ , any variable in  $\mathbf{V}$  will be d-separated from  $Y$  in  $G$  so that any query will be equal to  $P(Y)$  such that there is no graph surgery estimator.

Suppose  $S$  is connected with  $Y$ . Since  $S \notin An(Y)$ , for  $S$  to be connected with  $Y$ , any path from  $S$  to  $Y$  must have a collider. Let  $\mathbf{J}$  be the largest set such that  $P(Y|do(\mathbf{Q}), \mathbf{W}) = P(Y|do(\mathbf{Q} \cup \mathbf{J}), \mathbf{W} \setminus \mathbf{J})$  by rule 2 of do-calculus. In addition, let  $\mathbf{M}$  be the largest set such that  $P(Y|do(\mathbf{Q} \cup \mathbf{J}), \mathbf{W} \setminus \mathbf{J}) = P(Y|do((\mathbf{Q} \cup \mathbf{J}) \setminus \mathbf{M}), \mathbf{W} \setminus \mathbf{J})$  by rule 3 of do-calculus. If  $(\mathbf{Q} \cup \mathbf{J}) \setminus \mathbf{M} = \emptyset$ , then we reach the same contradiction as (i.). Suppose  $(\mathbf{Q} \cup \mathbf{J}) \setminus \mathbf{M} \neq \emptyset$ , it must be the case that any member in  $(\mathbf{Q} \cup \mathbf{J}) \setminus \mathbf{M}$  is d-connected with  $Y$  when conditioning on  $\mathbf{W} \setminus \mathbf{J}$  in  $G_{\overline{(\mathbf{Q} \cup \mathbf{J}) \setminus \mathbf{M}}}$  as implied by rule 3 of do-calculus.

Any such d-connecting path from a member  $A$  of  $(\mathbf{Q} \cup \mathbf{J}) \setminus \mathbf{M}$  to  $Y$  must begin with an outgoing edge of some members  $N$  in  $(\mathbf{Q} \cup \mathbf{J}) \setminus \mathbf{M}$  in  $G_{\overline{(\mathbf{Q} \cup \mathbf{J}) \setminus \mathbf{M}}}$ . Since  $Y$  does not have any parents, this d-connecting path must end at some children of  $Y$  or some bidirected neighbors of  $Y$  that are in  $\mathbf{W} \setminus \mathbf{J}$ . However, for any such child  $H$  or bidirected neighbor  $Z$  of  $Y$ , it must be that  $S \in Pa(T_H)$  and  $S \in Pa(T_{Y \cup Z})$  as implied by the condition that **ID4IP** returns **FAIL**.

For the case where the d-connecting path ends at  $H$ , without loss of generality, we consider the following three cases: *i.*  $N$  is in  $T_H$  or *ii.*  $N \in An(T_H) \setminus T_H$  or *iii.*  $N \in De(T_H) \setminus T_H$ . Note that the case  $N \in T_H$  subsumes the case when  $H$  is also a bidirected neighbor of  $Y$ .

*i.*  $N \in T_H$ : If  $N$  is in  $T_H$ , then  $P(Y|do(\mathbf{Q}), \mathbf{W})$  is unidentifiable in  $G$  by the following construction of hedge condition: for a query  $P(Y|do((\mathbf{Q} \cup \mathbf{J}) \setminus \mathbf{M}), \mathbf{W} \setminus \mathbf{J})$ , we can let  $\mathbf{R} = \{H\}$ , which is a proper subset of  $An(Y \cup (\mathbf{W} \setminus \mathbf{J}))$ . Also, we can let  $F' = \{H\}$  and  $F = T_H$  as  $T_H$  is a  $H$ -rooted C-tree. The result then follows Theorem 3.2.

For the next two cases, we will make use of this observation: observe that for any node  $U$  in  $T_H$ . By the definition of  $T_H$ , there must be a bidirected path from  $U$  to  $H$  that only goes through nodes in  $T_H$  and any node along this bidirected path must be an ancestor of  $H$ . Therefore, there is a d-connecting path from  $U$  to  $H$  that starts with an arrow into  $U$ . Note that further conditioning cannot break this path since the path only consists of colliders.

*ii.*  $N \in An(T_H) \setminus T_H$ : If  $N$  is in the  $An(T_H) \setminus T_H$  and  $H \in \mathbf{W} \setminus \mathbf{J}$ , then  $(Y \not\perp\!\!\!\perp S|\mathbf{W} \setminus \mathbf{J})_{G_{\overline{(\mathbf{Q} \cup \mathbf{J}) \setminus \mathbf{M}}}}$ . It is because  $S \in Pa(T_H)$  such that we can construct a d-connecting path from  $S$  to  $Y$  by concatenating  $Y \rightarrow H$  with the bidirected path as outlined in the observation. Note that no member in  $(\mathbf{Q} \cup \mathbf{J}) \setminus \mathbf{M}$  can be in  $T_H$  due to unidentifiability of the query as shown previously. Therefore, we have a contradiction. If  $H \notin \mathbf{W} \setminus \mathbf{J}$ , then any such path is blocked by  $H$ , which contradicts the fact that  $(\mathbf{Q} \cup \mathbf{J} \setminus \mathbf{M})$  is non-empty by rule 3 of do-calculus.

*iii.*  $N \in De(T_H) \setminus T_H$ : If  $N \in De(T_H) \setminus T_H$  and  $H \in \mathbf{W} \setminus \mathbf{J}$ , then we can obtain a d-connecting path from  $S$  to  $Y$  by concatenating  $Y \rightarrow H$  with the bidirected path as outlined in the observation, which is a contradiction. If  $N \in De(T_H) \setminus T_H$  and  $H \notin \mathbf{W} \setminus \mathbf{J}$ , then the such path is blocked by  $H$ , which contradict to the fact that  $(\mathbf{Q} \cup \mathbf{J} \setminus \mathbf{M})$  is non-empty by rule 3 of do-calculus.

For the case where the d-connecting path ends at a bidirected neighbor  $Z$  of  $Y$  that is not a child of  $Y$ , without loss of generality, we also consider three cases: *i.*  $N$  is in  $T_{Y \cup Z}$  or *ii.*  $N \in An(T_{Y \cup Z}) \setminus T_{Y \cup Z}$  or *iii.*  $N \in De(T_{Y \cup Z})$ .

*i.*  $N \in T_{Y \cup Z}$ : If  $N$  is in  $T_{Y \cup Z}$ , we can construct two  $\mathbf{R}$ -rooted C-forests  $F = T_{Y \cup Z}, F' = \{Y, Z\}$  such that  $F \cap N \neq \emptyset, F' \cap N = \emptyset$ , where  $\mathbf{R} = \{Y, Z\}$ , which is the proper subset of  $An(Y \cup (\mathbf{W} \setminus \mathbf{J}))$  such that there exists a hedge for  $P(Y|do((\mathbf{Q} \cup \mathbf{J}) \setminus \mathbf{M}), \mathbf{W} \setminus \mathbf{J})$  by the characterization of generalized hedge condition. By Theorem 3.2,  $P(Y|do((\mathbf{Q} \cup \mathbf{J}) \setminus \mathbf{M}), \mathbf{W} \setminus \mathbf{J})$  is unidentifiable in  $G$ , which is a contradiction.

For the next two cases, we will make use of this observation: observe that any node  $U$  in  $T_{Y \cup Z}$ , there must be a bidirected path from  $U$  to  $Z$  and  $Y$  that only goes through nodes in  $T_{Y \cup Z}$ . By definition of  $T_{Y \cup Z}$ , any node along this bidirected path must be an ancestor of  $Z$  or  $Y$ . Therefore, there is a d-connecting path from  $U$  to  $Z$  or  $Y$  that starts with an arrow into  $U$ . Note that further conditioning cannot break this path since the path only consists of colliders.

*ii.*  $N \in An(T_{Y \cup Z}) \setminus T_{Y \cup Z}$ : If  $N$  is in  $An(T_{Y \cup Z}) \setminus T_{Y \cup Z}$  and  $Z \in \mathbf{W} \setminus \mathbf{J}$ , then  $(Y \not\perp\!\!\!\perp S | \mathbf{W} \setminus \mathbf{J})_{G_{\overline{\mathbf{Q} \cup \mathbf{J} \setminus \mathbf{M}}}}$ . It is because  $S \in Pa(T_{Y \cup Z})$  such that we can construct a d-connecting path from  $S$  to  $Y$  by concatenating  $Y \leftrightarrow Z$  with the bidirected path as outlined in the observation. Also, no member in  $(\mathbf{Q} \cup \mathbf{J}) \setminus \mathbf{M}$  can be in  $T_{Y \cup Z}$  due to unidentifiability of the query as shown previously. If  $Z \notin \mathbf{W} \setminus \mathbf{J}$ , then any such path is blocked by  $Z$ , which contradicts the fact that  $(\mathbf{Q} \cup \mathbf{J}) \setminus \mathbf{M}$  is non-empty by rule 3 of do-calculus

*iii.*  $N \in De(T_{Y \cup Z}) \setminus T_{Y \cup Z}$ : If  $N \in De(T_{Y \cup Z}) \setminus T_{Y \cup Z}$  and  $Z \in \mathbf{W} \setminus \mathbf{J}$ , then we can obtain a d-connecting path from  $S$  to  $Y$  by concatenating  $Y \leftrightarrow Z$  with the bidirected path as outlined in the observation. If  $N \in De(T_{Y \cup Z}) \setminus T_{Y \cup Z}$  and  $Z \notin \mathbf{W} \setminus \mathbf{J}$ , then such path is blocked by  $Z$ , which contradict to the fact that  $(\mathbf{Q} \cup \mathbf{J}) \setminus \mathbf{M}$  is non-empty by rule 3 of do-calculus.

Therefore, we reach a contradiction to the case where  $\mathbf{Q} \neq \emptyset$  and  $\mathbf{W} \neq \emptyset$ .

Thus, there exists no graph surgery estimator. By contraposition, if there exists a graph surgery estimator, **ID4IP** (Algorithm 3) outputs a graph surgery estimator.  $\square$

## A.8 PROOF OF THEOREM 3.12

**Theorem A.9. (Soundness of Algorithm 3:ID4IP)** *When Algorithm 3:ID4IP returns an estimator, it is a graph surgery estimator with respect to the given target and the selection variable in  $G$ .*

*Proof.* For line 5- 6 in Algorithm 3, the soundness follows Theorem 3.7 where we describe how selection variable being a parent of  $T_y$  implies there is no graph surgery estimator. Then, the soundness of line 7 will follow Corollary 3.9 which shows how **ID4IP** can get graph surgery estimators by utilizing the parents of the MACS of  $Y$ .

In addition, Theorem 3.8 ensures the correctness of line 8 which utilizes the parents of the MACS of some children of the target that are not selection variables. For line 10, the soundness follows Theorem 3.10 which shows how **ID4IP** can find graph surgery estimators if any by utilizing the parents of the MACS of the bidirected neighbors of  $Y$ . Lastly, line 13 follows Theorem 3.11 which guarantees **ID4IP** to find at least one graph surgery estimator or show that there is no graph surgery estimator.  $\square$

## A.9 PROOF OF THEOREM 4.1

In this proof, we will make use of the following theorems for the proof.

**Theorem A.10. (Bayes-ball Complexity)** [2] *Given a causal graph  $G = (\mathbf{V}, \mathbf{E})$ , the time complexity of Bayes-ball algorithm is  $O(|\mathbf{V}| + |\mathbf{E}_{\mathbf{V}}|)$ , where  $\mathbf{E}_{\mathbf{V}}$  are the edges incident to the nodes marked during the algorithm. In the worst case, it is linear time in the size of the graph.*

**Theorem A.11.** [5] *Find-MACS-on-set( $G, \mathbf{Y}$ ) outputs the MACS of  $\mathbf{Y}$  in polynomial time in the size of graph.*

*Proof.* Let  $|Ch(S)| = C$ . the Graph Surgery Estimator algorithm first finds all supersets of  $Ch(S)$ . Getting all supersets of  $Ch(S)$  takes the complexity of  $O(2^{|\mathbf{V}| - C})$ . Then, for each superset  $\mathbf{M}$ , the Graph Surgery Estimator algorithm finds the power set of  $\mathbf{V} \setminus (\mathbf{M} \cup \mathbf{Y})$ , which takes  $O(2^{|\mathbf{V}| \setminus (\mathbf{M} \cup \mathbf{Y})})$ . Asymptotically, the complexity of finding power set for each superset becomes  $O(2^{|\mathbf{V}| - (C+1)})$  as  $Ch(S)$  is the smallest superset of  $Ch(S)$ . Then, for each member  $\mathbf{Q}$  of each power set, two major operations attribute to the complexity of the algorithm are:

1. Using a for-loop to search through each member in  $\mathbf{Q}$ . Then, it checks for d-separation condition within each loop, resulting in the complexity of  $O(|\mathbf{Q}| \times (|\mathbf{V}| + |\mathbf{E}_{\mathbf{V}}|))$  with the use of Bayes-ball algorithm [2].
2. Calling **ID** algorithm for checking the identifiability of the returned unconditional query, which takes the complexity of  $O(B)$

$\square$

**Theorem A.12. (GSE Complexity)** Let  $|Ch(S)| = C$ ,  $\mathbf{M} = Ch(S)$ ,  $\mathbf{Q} = \mathbf{V} \setminus (\mathbf{M} \cup Y)$ . Given a causal graph  $G = (\mathbf{V}, \mathbf{E})$  and disjoint variables  $\mathbf{X}, \mathbf{Y} \subset V$ , the time complexity of Graph Surgery Estimator (GSE) (Algorithm 5 in Section B.4) is:  $O(2^{2(|\mathbf{V}|-C)-1} \times B)$ , where  $B$  represents the time complexity of **ID** algorithm.

*Proof.* From Theorem A.11 and A.10, we can derive the the complexity of the Graph Surgery Estimator as  $O(2^{|\mathbf{V}|-C+|\mathbf{V} \setminus (\mathbf{M} \cup Y)|} \times |\mathbf{Q}| \times (|\mathbf{V}| + |\mathbf{E}_{\mathbf{V}}|) \times B)$ , which we can simplify to  $O(2^{2(|\mathbf{V}|-C)-1} \times B)$ .  $\square$

### A.10 PROOF OF THEOREM 4.3

**Theorem A.13. (ID4IP Complexity)** Given a causal graph  $G = (\mathbf{V}, E)$  and disjoint variables  $\mathbf{X}, \mathbf{Y} \subseteq \mathbf{V}$ , the complexity of **ID4IP** (Algorithm 3) is  $O((|C(Y) \cap Nbr(Y)| \setminus (T_Y \cup T_C)| + |Ch(Y)| + 1)K + (|T_Y| - 1 + |T_J| + |T'_J| - |\mathcal{H}'| - |\mathcal{H}|)B)$ , where  $K$  represents the time complexity of **Find-MACS-on-set** and  $B$  represents the time complexity of **ID** algorithm,  $T_Y$  be the MACS of  $Y$  in  $G$ ,  $T_H$  be the MACS of a child  $H$  of  $Y$  in  $G$ , and  $T_C := \bigcup_{H \in Ch(Y)} T_H$ .

*Proof.* By Theorem 4.2, **Find-MACS-on-set** outputs the MACS of a set in polynomial time in the size of the graph. We let  $O(K)$  be the complexity of **Find-MACS-on-set** so that line 4 takes  $O(K)$ . Let  $O(B)$  be the time complexity of **ID** algorithm. At line 7 of **ID4IP**, it takes  $O(|T_Y| - 1)$  to search through the sets  $\mathbf{W}$  and each time it calls on **ID** algorithm so that each **Greedy-Eval** takes  $O((|T_Y| - 1)B)$ . The line 8 takes  $O(|Ch(Y)|K + (|T_J| - |\mathcal{H}|)B)$  because we call on **Find-MACS-on-set**  $|Ch(Y)|$  many times and each time **Find-MACS-on-set** takes  $O(K)$ . Now we have,  $\mathcal{H} := \{H : H \in Ch(Y), Pa(T_H) \not\cong S\}$  and  $T_J := \bigcup_{H \in \mathbf{K}} T_H$  for any  $\mathbf{K} \subseteq \mathcal{H}$ , where  $T_H$  is the MACS with respect to the variable  $H$ . Therefore, after finding the MACS of each child of  $Y$ , we use **Greedy-Eval**, which calls on **ID** algorithm  $|T_J| - |\mathcal{H}|$  times.

Line 10, similar to line 8, it finds the MACS of each bidirected neighbor of  $Y$  that is not child nor parent of  $Y$ , which results in  $O((|C(Y) \cap Nbr(Y)| \setminus (T_Y \cup T_C)|K)$ . Here, we have,  $\mathcal{H}' := \{H' : H' \in (C(Y) \cap Nbr(Y)) \setminus (T_Y \cup T_C), Pa(T_{H'}) \not\cong S\}$  and  $T'_J := \bigcup_{H' \in \mathbf{K}'} T_{H'}$  for any  $\mathbf{K}' \subseteq \mathcal{H}'$ , where  $T_{H'}$  is the MACS with respect to the variable  $H'$ . Then, we will use **Greedy-Eval**, which calls on **ID** algorithm  $|T'_J| - |\mathcal{H}'|$  times, where  $T'_J \neq T_J$  and  $\mathcal{H}' \neq \mathcal{H}$ . Therefore, line 10 takes  $O((|C(Y) \cap Nbr(Y)| \setminus (T_Y \cup T_C)|K + (|T'_J| - |\mathcal{H}'|)B)$ . Therefore, **ID4IP** takes  $O(K + (|T_Y| - 1)B + |Ch(Y)|K + (|T_J| - |\mathcal{H}|)B + (|C(Y) \cap Nbr(Y)| \setminus (T_Y \cup T_C)|K + (|T'_J| - |\mathcal{H}'|)B)$ , which can be simplified to  $O((|C(Y) \cap Nbr(Y)| \setminus (T_Y \cup T_C)| + |Ch(Y)| + 1)K + (|T_Y| - 1 + |T_J| + |T'_J| - |\mathcal{H}'| - |\mathcal{H}|)B)$   $\square$

### A.11 PROOF OF LEMMA A.14

**Lemma A.14.** *If there is no hedge for  $P(\mathbf{Y}|\text{do}(\mathbf{X}))$ , then  $P(\mathbf{Y}|\text{do}(\mathbf{X}))$  is identifiable in  $G$ .*

*Proof.* Suppose there is no hedge for  $P(\mathbf{Y}|\text{do}(\mathbf{X}))$ . Therefore, for any  $\mathbf{R} \subseteq An(Y)_{G_{\overline{\mathbf{X}}}}$ , there does not exist two  $\mathbf{R}$ -rooted C forests  $F' \subset F \subseteq V$  such that  $F \cap \mathbf{X} \neq \emptyset$  and  $F' \cap \mathbf{X} = \emptyset$ . Equivalently, it must be the case that for any  $\mathbf{R} \subseteq An(Y)_{G_{\overline{\mathbf{X}}}}$  and  $\mathbf{R}$ -rooted C forests  $F' \subset F \subseteq V$ , either  $F \cap \mathbf{X} = \emptyset$  or  $F' \cap \mathbf{X} \neq \emptyset$ .

We consider two cases: *i.*) there is no bidirected path from  $\mathbf{X}$  to any of its children *ii.*) there is a bidirected path from  $\mathbf{X}$  to some of its children.

**Suppose there is no bidirected path from any of the nodes in  $\mathbf{X}$  to any of their children in  $G_{An(\mathbf{Y})}$ .** By Theorem 4 of [7], the query  $P(\mathbf{Y}|\text{do}(\mathbf{X}))$  is then identifiable.

**Suppose there is a bidirected path from some of the nodes in  $\mathbf{X}$  to some of their children in  $G_{An(\mathbf{Y})}$ .** For case *ii*, suppose there is a bidirected path from  $\mathbf{X}$  to some of its children in  $G_{An(\mathbf{Y})}$ . For any  $\mathbf{R} \subseteq An(\mathbf{Y})_{G_{\overline{\mathbf{X}}}}$ , either there is  $\mathbf{R}$ -rooted C-forest  $F'$  such that  $F' \cap \mathbf{X} = \emptyset$  but  $F \cap \mathbf{X} \neq \emptyset$  or there is a  $\mathbf{R}$ -rooted C-forest  $F$  such that  $F \cap \mathbf{X} \neq \emptyset$  but  $F' \cap \mathbf{X} = \emptyset$  for any  $\mathbf{R}$ -rooted C-forest  $F'$ . Given these conditions, we will show that by soundness of **ID** algorithm [4], we will have  $p(\mathbf{y}|\text{do}(\mathbf{x}))$  being identifiable in  $G$ .

We will briefly describe the **ID** algorithm (Algorithm 3) here. At step 6, the **ID** algorithm takes the induced subgraph of  $G$  over  $An(\mathbf{Y})$ , then it partitions  $G_{An(\mathbf{Y})}$  into various induced subgraphs of  $G_{An(\mathbf{Y})}$  over all possible C-components at step 13 of the algorithm. Since there is a hedge for  $p(\mathbf{y}|\text{do}(\mathbf{x}))$  if and only if the **ID** algorithm returns at step 18 of the algorithm by the soundness of **ID** algorithm, we will proceed by showing we will never run into step 18 of the algorithm given the conditions described in the previous paragraph.



When **ID** algorithm returns FAIL, the graph  $G$  at step 17 may not necessarily refer to the original causal graph  $G$  that has been passed into **ID**, but rather a subgraph of  $G$  after taking step 13 of the algorithm along with the other potential recursive steps 6 through 11. We use  $G' \subseteq G$  in the rest of the argument for the sake of clarity.

For the sake of contradiction, assume there exists a C-component in some subgraphs of  $G' \subseteq G$  such that  $C(G \setminus \mathbf{X}) = \{S\}$  and  $C(G') = \{G'\}$ . By definition, we can construct a **R**-rooted C-forest  $F'$  as  $S$  such that  $F' \cap \mathbf{X} = \emptyset$ . Now, given  $C(G') = \{G'\}$  and by definition of hedge,  $\mathbf{X} \notin \mathbf{R}$ , we can also construct another **R**-rooted C-forest  $F$  such that  $F \cap \mathbf{X} \neq \emptyset$ . Then, there exists a hedge for  $P(\mathbf{Y}|do(\mathbf{X}))$ , which is a contradiction. Therefore, we will never run into step 5 of the **ID** algorithm. Then, **ID** will return an identifiable query. Therefore, we have that  $P(\mathbf{Y}|do(\mathbf{X}))$  is identifiable in  $G$ .  $\square$

## A.12 PROOF OF THEOREM A.15

**Theorem A.15.** *There exists a hedge for  $P(\mathbf{Y}|do(\mathbf{X}))$  if and only if  $P(\mathbf{Y}|do(\mathbf{X}))$  is unidentifiable in  $G$*

*Proof.* By Lemma A.14 and Theorem 4 in [3], the result follows.  $\square$

## A.13 PROOF OF THEOREM A.16

**Theorem A.16.**  *$P(Y|do(\mathbf{X}))$  is identifiable if and only if there is no hedge for  $P(Y|do(\mathbf{X}'))$  where  $\mathbf{X}'$  is the smallest subset of  $\mathbf{X}$  such that  $P(Y|do(\mathbf{X}')) = P(Y|do(\mathbf{X}))$ .*

*Proof.* ( $\Leftarrow$ ) Suppose there is no hedge for  $P(Y|do(\mathbf{X}'))$ , where  $\mathbf{X}'$  is the smallest subset of  $\mathbf{X}$  such that  $P(Y|do(\mathbf{X}')) = p(y|do(\mathbf{x}))$ . Since  $P(Y|do(\mathbf{X}')) = P(Y|do(\mathbf{X}))$ , there also exists no hedge for  $P(Y|do(\mathbf{X}))$ . By Lemma A.14, we have that  $P(Y|do(\mathbf{X}))$  is identifiable in  $G$ .

( $\Rightarrow$ ) Suppose there exists a hedge for  $P(Y|do(\mathbf{X}'))$ , where  $\mathbf{X}'$  is the smallest subset of  $\mathbf{X}$  such that  $P(Y|do(\mathbf{X}')) = P(Y|do(\mathbf{X}))$ . Then, by Theorem 4 in [3], we have that  $P(Y|do(\mathbf{X}'))$  is unidentifiable so that  $P(Y|do(\mathbf{X}))$  is also unidentifiable. By contraposition,  $p(y|do(\mathbf{x}))$  is identifiable implies there is no hedge for  $P(Y|do(\mathbf{X}'))$ , where  $\mathbf{X}'$  is the smallest subset of  $\mathbf{X}$  such that  $P(Y|do(\mathbf{X}')) = P(Y|do(\mathbf{X}))$ .  $\square$

## A.14 PROOF OF LEMMA A.17

**Lemma A.17.** *Let  $F$  be a  $Y$ -rooted C-tree in  $G = (\mathbf{V}, \mathbf{E})$ . For any  $K \in F \setminus \{Y\}$  such that  $K \subseteq \mathbf{J} \subseteq \mathbf{V} \setminus \{Y\}$  and for any  $\mathbf{W} \subseteq \mathbf{V} \setminus (\mathbf{J} \cup Y)$ ,  $P(Y|do(\mathbf{J}), \mathbf{W})$  is unidentifiable in  $G$ .*

*Proof.* We will show that there exists a hedge for  $p(y|do(\mathbf{j}), \mathbf{w})$  according to the definition 3.1. By Theorem 20 in [4], there exists a unique maximal set  $\mathbf{Z}$  such that  $P(Y|do(\mathbf{J}), \mathbf{W}) = P(Y|do(\mathbf{J}, \mathbf{Z}), \mathbf{W} \setminus \mathbf{Z})$ . Since  $K \in F \setminus \{Y\}$  and  $K \subseteq \mathbf{J}$ , we have that  $F \cap (\mathbf{J} \cup \mathbf{Z}) \neq \emptyset$ . Next, we let  $F' = \{Y\}$  such that  $F' \cap (\mathbf{J} \cup \mathbf{Z}) = \emptyset$ . By definition 3.1, there exists a hedge for  $P(Y|do(\mathbf{J}), \mathbf{W})$ . By Theorem 3.2,  $P(Y|do(\mathbf{J}), \mathbf{W})$  is unidentifiable in  $G$ .  $\square$

## B ALGORITHMS

In this section, we provide the pseudo-codes of the algorithms that we call as sub-routines from the algorithms in the main paper.

### B.1 COMPUTELOSS

- 1: **Input:** A set of targets  $\mathbf{Y}$ , an intervention set  $\mathbf{X}$
- 2: **Output:** the value of  $P(\mathbf{Y}|do(\mathbf{X}))$
- 3:  $P = \mathbf{ID}(\mathbf{Y}, \mathbf{X}, G)$  {Algorithm 3}
- 4:  $P_s = P / \sum_{\mathbf{Y}} P$
- 5:  $L =$  Compute validation loss  $l(P_s)$
- 6: **Return**  $L$

**Algorithm 1:** computeLoss( $\mathbf{Y}, \mathbf{X}$ )

## B.2 FIND-MACS-ON-SET

- 1: **Input:** A causal graph  $G$ , an AC-component  $\mathbf{Y}$  in  $G$
- 2: **Output:**  $T_{\mathbf{Y}}$ , a subgraph of  $G$ , the maximal ancestral confounded set for  $\mathbf{Y}$  in  $G$ .
- 3: **if**  $\exists X \notin An(\mathbf{Y})_G$  **then**
- 4:     **Return** **Find-MACS-on-set**( $G_{An(\mathbf{Y})}, \mathbf{Y}$ )
- 5: **if**  $\exists Y \in \mathbf{Y}, \exists X \notin C(Y)_G$  **then**
- 6:     **Return** **Find-MACS-on-set**( $G_{C(Y)}, \mathbf{Y}$ )
- 7: **else**
- 8:     **Return**  $G$

**Algorithm 2:** Find-MACS-on-set( $G, \mathbf{Y}$ )[5]

## B.3 ID ALGORITHM

- 1: **Input:** a set of target variables  $\mathbf{Y}$ , a set of random variables for intervention  $\mathbf{X}$ , a probability distribution  $P$ , a causal graph  $G$
- 2: **Output:** Expression for  $P(Y|do(\mathbf{X}))$  in terms of  $P$  or **FAIL**( $F, F'$ )
- 3: **if**  $\mathbf{X} = \emptyset$  **then**
- 4:     **Return**  $\sum_{\mathbf{V} \setminus \mathbf{Y}} P(\mathbf{v})$
- 5: **if**  $\mathbf{V} \setminus An(\mathbf{Y})_G \neq \emptyset$  **then**
- 6:     **Return** **ID**( $\mathbf{Y}, \mathbf{X} \cap An(\mathbf{Y})_G, \sum_{\mathbf{V} \setminus An(\mathbf{Y})_G} P, G_{An(\mathbf{Y})}$ )
- 7: Let  $\mathbf{W} = (\mathbf{V} \setminus \mathbf{X}) \setminus An(\mathbf{Y})_{G_{\mathbf{X}}}$
- 8: **if**  $\mathbf{W} \neq \emptyset$  **then**
- 9:     **Return** **ID**( $\mathbf{Y}, \mathbf{X} \cup \mathbf{W}, P, G$ )
- 10: **if**  $C(G \setminus \mathbf{X}) = \{S_1, \dots, S_k\}$  **then**
- 11:     **Return**  $\sum_{\mathbf{V} \setminus (\mathbf{Y} \cup \mathbf{X})} \prod_i \mathbf{ID}(S_i, \mathbf{V} \setminus S_i, P, G)$
- 12: **if**  $C(G \setminus \mathbf{X}) = \{S\}$  **then**
- 13:     **if**  $C(G) = \{G\}$  **then**
- 14:         **Return** **FAIL**( $G, G \cap S$ )
- 15:     **if**  $S \in C(G)$  **then**
- 16:         **Return**  $\sum_{S \setminus \mathbf{Y}} \prod_{\{i|V_i \in S\}} P(V_i|V_{\pi}^{i-1})$
- 17:     **if**  $\exists S$  s.t.  $S \subset S' \in C(G)$  **then**
- 18:         **Return** **ID**( $\mathbf{Y}, \mathbf{X} \cap S', \prod_{\{i|V_i \in S\}} P(V_i|V_{\pi}^{(i-1)} \setminus S), G_{S'}$ )

**Algorithm 3:** ID( $\mathbf{Y}, \mathbf{X}, P, G$ ) [4]

## B.4 GRAPH SURGERY ESTIMATOR ALGORITHM

In this section, we present the main algorithms in [6].

- 1: **Input:** Acyclic Directed Mixed Graph (ADMG)  $G = (\mathbf{V}, \mathbf{E})$ , disjoint variable sets  $\mathbf{X}, \mathbf{Y}, \mathbf{Z} \subset \mathbf{V}$
- 2: **Output:** Unconditional query  $P(\mathbf{Y}|do(\mathbf{X}), \mathbf{Z})$
- 3:  $\mathbf{X}' = \mathbf{X}$
- 4:  $\mathbf{Y}' = \mathbf{Y}$
- 5:  $\mathbf{Z}' = \mathbf{Z}$
- 6: **while**  $\exists Z \in \mathbf{Z}$  s.t.  $(\mathbf{Y} \perp\!\!\!\perp Z | \mathbf{X}, \mathbf{Z} \setminus \{Z\})_{G_{\mathbf{X}, \mathbf{Z}}}$  **do**
- 7:      $\mathbf{X}' = \mathbf{X}' \cup Z$
- 8:      $\mathbf{Z}' = \mathbf{Z}' \setminus \{Z\}$
- 9:  $\mathbf{Y}' = \mathbf{Y} \cup \mathbf{Z}$
- 10: **Return**  $\mathbf{X}', \mathbf{Y}'$  of unconditional query  $P(\mathbf{Y}'|do(\mathbf{X}'))$

**Algorithm 4:** Unconditional Query: UQ( $\mathbf{X}, \mathbf{Y}, \mathbf{Z}; G$ )[6]

```

1: Input: ADMG  $G$ , mutable variables  $\mathbf{M}$ , target  $T$ 
2: Output: Expression for the surgery estimator or FAIL if there is no stable estimator.
3:  $S_{ID} = \emptyset$ 
4:  $Loss = \emptyset$ 
5: for  $\mathbf{Z} \in \mathcal{P}(\mathbf{V} \setminus (\mathbf{M} \cup \{T\}))$  do
6:   if  $T \notin \mathbf{M}$  then
7:      $\mathbf{X}, \mathbf{Y} = UQ(\mathbf{M}, \{T\}, \mathbf{Z}, \mathcal{G})$ 
8:     try
9:        $P = \mathbf{ID}(\mathbf{X}, \mathbf{Y}, G)$ 
10:       $P_s = P / \sum_Y P$ 
11:      Compute the validation loss  $l(P_s)$ 
12:       $S_{ID}.append(P_s); Loss.append(l(P_s))$ 
13:     catch
14:       continue
15:    $\mathbf{X}, \mathbf{Y} = \mathbf{UQ}(\mathbf{M}, \{T\}, \mathbf{Z}; \mathbf{G}_T)$ 
16:    $\mathbf{X} = \mathbf{X} \cup \{T\}$ 
17:    $\mathbf{Y} = \mathbf{Y} \setminus \{T\}$ 
18:   if  $\mathbf{Y} \cap (T \cup Ch(T)) = \emptyset$  then
19:     continue
20:   try
21:      $P = \mathbf{ID}(\mathbf{X}, \mathbf{Y}, G)$ 
22:      $P_s = P / \sum_Y P$ 
23:     Compute the validation loss  $l(P_s)$ 
24:      $S_{ID}.append(P_s); Loss.append(l(P_s))$ 
25:   catch
26:     continue
27: if  $S_{ID} = \emptyset$  then
28:   Return FAIL
29: Return  $P_s \in S_{ID}$  with lowest corresponding  $Loss$ 

```

**Algorithm 5:** Graph Surgery Estimator ( $G, \mathbf{M}, Y$ )[6]

## C SEMI-SYNTHETIC CAUSAL GRAPHS

### C.1 SACHS CAUSAL GRAPH

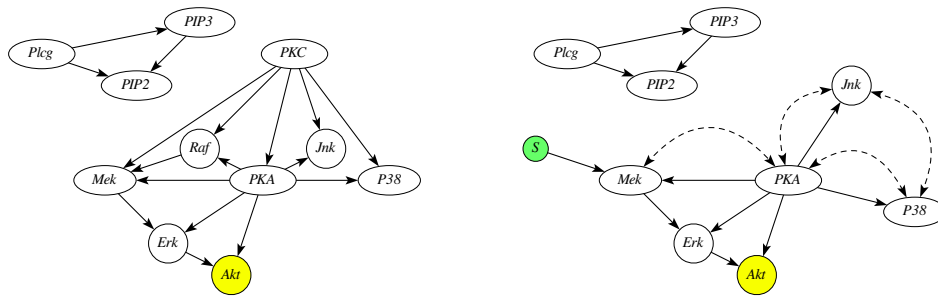

(a) Original Sachs causal graph with the target variable (yellow) (b) Modified Sachs causal graph with the selection variable (green)

Figure 1: Semi-synthetic experimental results

## C.2 ALARM CAUSAL GRAPH

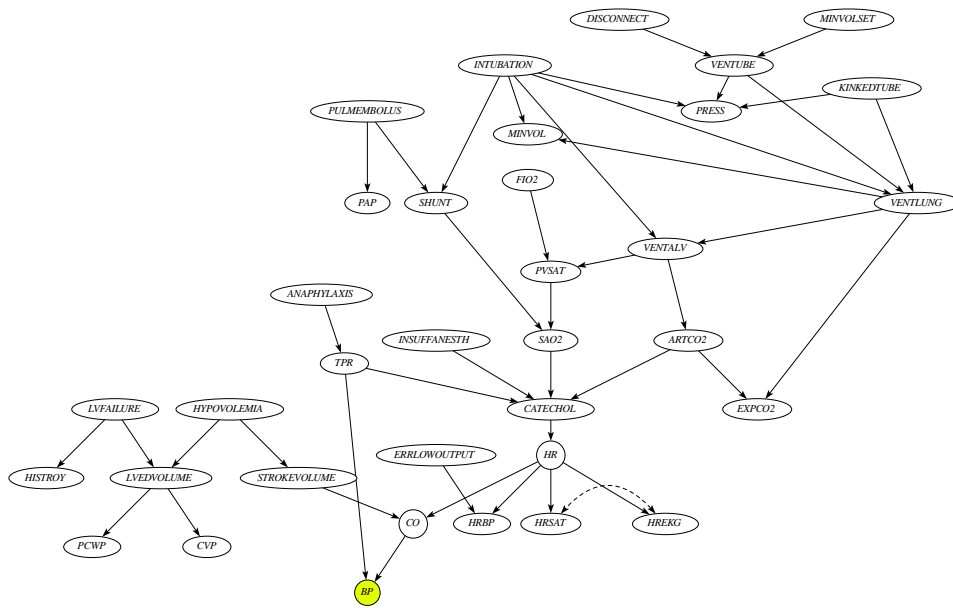

(a) Original Alarm causal graph with the target variable (yellow)

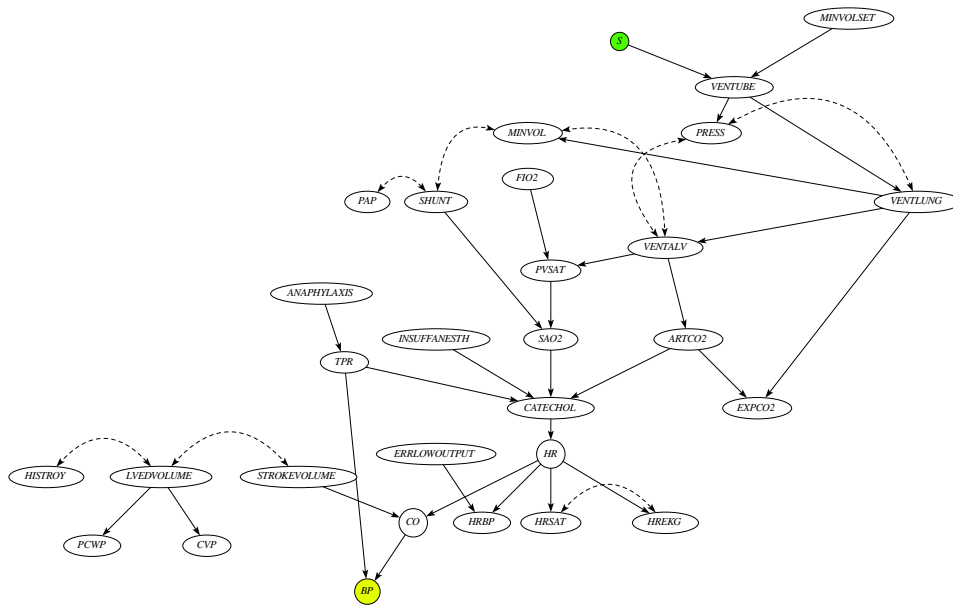

(b) Modified Alarm causal graph with the selection variable (green)

Figure 2: Semi-synthetic causal graph: Alarm

## REFERENCES

- [1] Thomas Richardson and Peter Spirtes. Ancestral graph markov models. *The Annals of Statistics*, 30(4):962–1030, 2002.

- [2] Ross D Shachter. Bayes-ball: The rational pastime (for determining irrelevance and requisite information in belief networks and influence diagrams). *arXiv preprint arXiv:1301.7412*, 2013.
- [3] Ilya Shpitser and Judea Pearl. *Identification of joint interventional distributions in recursive semi-Markovian causal models*. eScholarship, University of California, 2006.
- [4] Ilya Shpitser and Judea Pearl. Complete identification methods for the causal hierarchy. *Journal of Machine Learning Research*, 9:1941–1979, 2008.
- [5] Ilya Shpitser and Judea Pearl. *Dormant independence*. AAAI Press, 2008.
- [6] Adarsh Subbaswamy, Peter Schulam, and Suchi Saria. Preventing failures due to dataset shift: Learning predictive models that transport. In *The 22nd International Conference on Artificial Intelligence and Statistics*, pages 3118–3127. PMLR, 2019.
- [7] Jin Tian and Judea Pearl. *A general identification condition for causal effects*. eScholarship, University of California, 2002.
